# Supplementary material for: Diagnostic and Prognostic Performance of Liquid Biopsy-Derived Exosomal MicroRNAs in Thyroid Cancer Patients: A Systematic Review and Meta-Analysis
Source: MDPI journal article supplement (doi:10.3390/cancers13174295), 2021-08-26
Supplement: s1 [file s1]

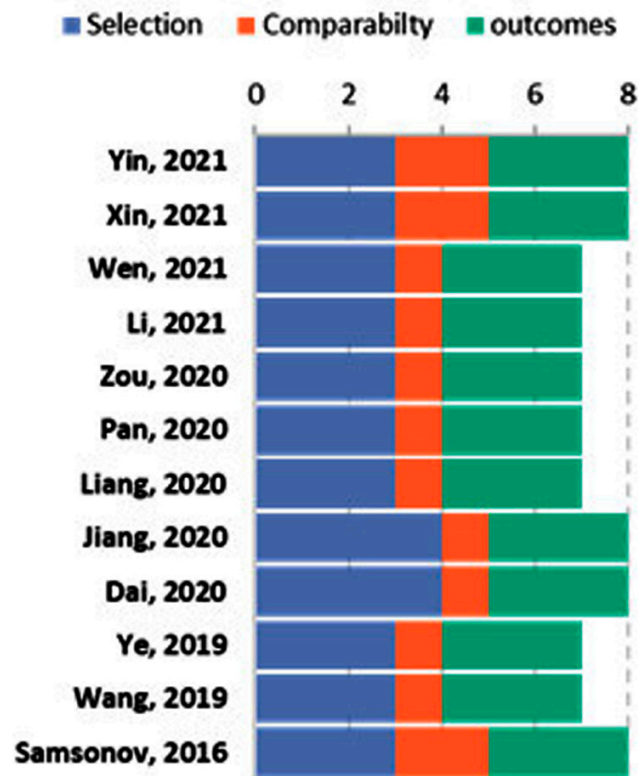

**Supplementary Figure S1.** Quality assessment for included studies. Evaluation using Newcastle-Ottawa Scale was carried out.

**Supplementary Table S1.** Major recommendations of MISEV.

**1. EV separation/isolation**

- a) There is no single optimal isolation method, so choose based on the downstream applications and scientific question
- b) Report all details of the method(s) for reproducibility **(1)**

**2. EV characterization**

- a) General characterization. Show:

- i. At least three positive protein markers of EVs, including at least one **(3)**

- transmembrane/lipid-bound protein

- cytosolic protein

- ii. At least one negative protein marker **(1)**

- b) Characterization of single vesicles: use two different but complementary techniques, for example:

- i. electron or atomic force microscopy (and show both close-up and wide-field) **(1)**

- ii. single-particle tracking **(1)**

**3. Functional studies should include:**

- a) Dose-response studies **(1)**

- b) Process controls to rule out the influence of serum components/other possible contaminants **(1)**

- c-i.) Density gradients to show activity is intrinsic to EVs, not just associated **(1)**

- or** c-ii.) EV depletion to remove activity

- or** c-iii.) EV/cell labeling (e.g., fluorescent labeling, with careful interpretation)

MISEV: minimal information for studies of extracellular vesicles [24]. The number between brackets is the assigned score for each item that evaluates the included studies in this meta-analysis. The total score is 10.

**Supplementary Table S2.** Deregulated exosomal miRNAs in thyroid cancer.

| miRNAs             | No. cancer cases | No. controls | Assay   | Log2Fold change | Cutoff (ROC) | AUC (95%CI)         | Sensitivity (95%CI) | Specificity (95%CI) | Ref  |
|--------------------|------------------|--------------|---------|-----------------|--------------|---------------------|---------------------|---------------------|------|
| <b>Upregulated</b> |                  |              |         |                 |              |                     |                     |                     |      |
| miR-25-3p          | 48               | 45 normal    | qRT-PCR | 0.62            |              |                     |                     |                     | [30] |
| miR-92a-3p         | 48               | 45 normal    | qRT-PCR | 0.78            |              |                     |                     |                     | [30] |
| miR-296-5p         | 48               | 45 normal    | qRT-PCR | 1.01            |              |                     |                     |                     | [30] |
| miR-25-3p          | 34               | 35 normal    | qRT-PCR | 1.28            |              | 0.623 (0.542-0.704) | 64.1%               | 60.4%               | [30] |
| miR-92a-3p         | 34               | 35 normal    | qRT-PCR | 0.83            |              | 0.702 (0.626-0.778) | 67.4%               | 69.2%               | [30] |
| miR-296-5p         | 34               | 35 normal    | qRT-PCR | 1.04            |              | 0.621 (0.54-0.70)   | 75%                 | 50.5%               | [30] |
| miR-485-3p         | 96               | 30 normal    | qRT-PCR |                 |              | 0.866 (0.79-0.94)   | 80.2%               | 71.2%               | [33] |
| miR-4433a-5p       | 96               | 30 normal    | qRT-PCR |                 |              | 0.863 (0.79-0.93)   | 81.3%               | 72.9%               | [33] |
| miR-4306           | 96               | 30 normal    | qRT-PCR |                 |              |                     |                     |                     | [33] |
| miR-376a-3p        | 96               | 30 normal    | qRT-PCR |                 |              |                     |                     |                     | [33] |
| miR-204-3p         | 96               | 30 normal    | qRT-PCR |                 |              |                     |                     |                     | [33] |
| miR-423-5p         | 60               | 30 normal    | qRT-PCR |                 |              |                     |                     |                     | [34] |
| miR-346            | 25               | 25 normal    | qRT-PCR | 1.08            |              | 0.834 (0.77-0.89)   |                     |                     | [35] |
| miR-10a-5p         | 25               | 25 normal    | qRT-PCR | 1.08            |              | 0.774 (0.71-0.84)   |                     |                     | [35] |
| miR-34a-5p         | 25               | 25 normal    | qRT-PCR | 1.33            |              | 0.760 (0.68-0.83)   |                     |                     | [35] |
| miR-223-5p         | 35               | 31 normal    | qRT-PCR |                 | <0.346       | 0.95                | 90.8% (80.9-96.5)   | 85.7% (67.3-95.9)   | [32] |
| miR-16-2-3p        | 35               | 31 normal    | qRT-PCR |                 | <0.301       | 0.938               | 93.8% (84.9-98.3)   | 89.3% (71.7-97.7)   | [32] |
| miR-223-3p         | 35               | 31 normal    | qRT-PCR |                 | <0.536       | 0.861               | 83.1% (71.7-81.2)   | 78.6% (59.1-91.7)   | [32] |
| miR-146b-5p        | 35               | 31 normal    | qRT-PCR |                 | <0.589       | 0.812               | 81.5% (69.9-90.1)   | 78.6% (59.1-91.7)   | [32] |
| miR-126-3p         | 10               | 8 NG         | qRT-PCR |                 |              |                     |                     |                     | [25] |
| miR-145-5p         | 10               | 8 NG         | qRT-PCR |                 |              |                     |                     |                     | [25] |
| miR-31-5p          | 10               | 8 NG         | qRT-PCR |                 |              |                     |                     |                     | [25] |
| miR-16-2-3p        | 35               | 30 NG        | qRT-PCR | 1.632           | >0.120       | 0.687               | 68.6% (50.7-83.2)   | 66.7% (47.2-82.7)   | [32] |
| miR-223-5p         | 35               | 30 NG        | qRT-PCR | 0.695           | >0.157       | 0.679               | 57.1% (39.4-73.7)   | 80.0% (61.4-92.3)   | [32] |
| miR-16-2-3p        | 16               | 8 NG         | NGS     | 0.971           |              |                     |                     |                     | [32] |
| miR-223-3p         | 16               | 8 NG         | NGS     | 1.042           |              |                     |                     |                     | [32] |
| miR-223-5p         | 16               | 8 NG         | NGS     | 0.787           |              |                     |                     |                     | [32] |
| miR-433-3p         | 16               | 8 NG         | NGS     | 0.283           |              |                     |                     |                     | [32] |
| miR-26a-5p         | 16               | 8 NG         | NGS     | 0.247           |              |                     |                     |                     | [32] |

|                      |     |            |         |        |                   |  |                   |                   |  |      |
|----------------------|-----|------------|---------|--------|-------------------|--|-------------------|-------------------|--|------|
| miR-146b-5p          | 16  | 8 NG       | NGS     | 0.773  |                   |  |                   |                   |  | [32] |
| miR-1307-3p          | 16  | 8 NG       | NGS     | 0.450  |                   |  |                   |                   |  | [32] |
| miR-425-5p           | 16  | 8 NG       | NGS     | 0.238  |                   |  |                   |                   |  | [32] |
| miR-132-5p           | 16  | 8 NG       | NGS     | 0.283  |                   |  |                   |                   |  | [32] |
| miR-598-5p           | 13  | 7 NG       | qRT-PCR |        |                   |  |                   |                   |  | [31] |
| miR-3161             | 13  | 7 NG       | qRT-PCR |        |                   |  |                   |                   |  | [31] |
| miR-6516-5p          | 13  | 7 NG       | qRT-PCR |        |                   |  |                   |                   |  | [31] |
| miR-4644             | 13  | 7 NG       | qRT-PCR |        |                   |  |                   |                   |  | [31] |
| miR-1283             | 13  | 7 NG       | qRT-PCR |        |                   |  |                   |                   |  | [31] |
| miR-5189-3p          | 13  | 7 NG       | qRT-PCR |        |                   |  |                   |                   |  | [31] |
| miR-485-3p           | 96  | 59 NG      | qRT-PCR |        | 0.858 (0.80-0.91) |  | 85.4%             | 73.3%             |  | [33] |
| miR-4433a-5p         | 96  | 59 NG      | qRT-PCR |        | 0.812 (0.74-0.89) |  | 83.3%             | 73.3%             |  | [33] |
| miR-187-3p           | 17  | 10 NG      | NGS     | 7.418  |                   |  |                   |                   |  | [33] |
| miR-204-3p           | 17  | 10 NG      | NGS     | 2.613  |                   |  |                   |                   |  | [33] |
| miR-219a-5p          | 17  | 10 NG      | NGS     | 2.13   |                   |  |                   |                   |  | [33] |
| miR-376a-3p          | 17  | 10 NG      | NGS     | 1.644  |                   |  |                   |                   |  | [33] |
| miR-378f             | 17  | 10 NG      | NGS     | 3.792  |                   |  |                   |                   |  | [33] |
| miR-4306             | 17  | 10 NG      | NGS     | 7.222  |                   |  |                   |                   |  | [33] |
| miR-4433a-5p         | 17  | 10 NG      | NGS     | 2.782  |                   |  |                   |                   |  | [33] |
| miR-485-3p           | 17  | 10 NG      | NGS     | 6.811  |                   |  |                   |                   |  | [33] |
| miR-524-5p           | 17  | 10 NG      | NGS     | 2.327  |                   |  |                   |                   |  | [33] |
| miR-654-5p           | 17  | 10 NG      | NGS     | 1.376  |                   |  |                   |                   |  | [33] |
| miR-7855-5p          | 17  | 10 NG      | NGS     | 4.512  |                   |  |                   |                   |  | [33] |
| miR-889-5p           | 17  | 10 NG      | NGS     | 3.458  |                   |  |                   |                   |  | [33] |
| <b>Downregulated</b> |     |            |         |        |                   |  |                   |                   |  |      |
| miR-130a-3p          | 40  | 40 normal  | qRT-PCR |        | 0.828 (0.76-0.88) |  | 88.8%             | 90.8%             |  | [26] |
| miR-29a              | 119 | 100 normal | qRT-PCR |        | 0.884             |  | 85.7%             | 78.9%             |  | [28] |
| miR-34c-5p           | 35  | 31 normal  | qRT-PCR | <0.339 | 0.880             |  | 81.5% (69.9-90.1) | 85.7% (67.3-95.9) |  | [32] |
| miR-182-5p           | 35  | 31 normal  | qRT-PCR | <0.396 | 0.908             |  | 93.9% (84.9-98.3) | 82.1% (63.1-93.9) |  | [32] |
| miR-1227-3p          | 13  | 7 NG       | qRT-PCR |        |                   |  |                   |                   |  | [31] |
| miR-149-3p           | 13  | 7 NG       | qRT-PCR |        |                   |  |                   |                   |  | [31] |
| miR-210-5p           | 13  | 7 NG       | qRT-PCR |        |                   |  |                   |                   |  | [31] |
| miR-3662             | 13  | 7 NG       | qRT-PCR |        |                   |  |                   |                   |  | [31] |
| miR-187-5p           | 13  | 7 NG       | qRT-PCR |        |                   |  |                   |                   |  | [31] |
| miR-5010-3p          | 13  | 7 NG       | qRT-PCR |        | 0.82              |  |                   |                   |  | [31] |
| miR-9-5p             | 16  | 8 NG       | NGS     | -0.326 |                   |  |                   |                   |  | [32] |

|            |    |      |     |        |      |
|------------|----|------|-----|--------|------|
| miR-101-3p | 16 | 8 NG | NGS | -0.525 | [32] |
| miR-34c-5p | 16 | 8 NG | NGS | -0.474 | [32] |

ROC: Receiver Operator Characteristics; AUC: area under the curve, CI: confidence interval; Ref: reference; NG: nodular goiter; qRT-PCR: quantitative Real-Time Reverse transcription Polymerase Chain Reaction; NGS: next-generation sequencing. The area under the curve (AUC) was used as an accurate measurement of the diagnostic marker. The larger the AUC, the better the prediction model. AUC=0.5 indicates no predictive power, whereas AUC=1 represents perfect predictive performance. Raw data with fold change was converted to log2 fold change. Within the same studies, expression values or diagnostic accuracy for different datasets for screening, training, testing, and external validation stages were reported separately.

**Supplementary Table S3.** Diagnostic role of combined miRNA panels in thyroid cancer.

| miRNAs                                             | No. cases | No. controls | Cutoff | AUC (95%CI)       | Sensitivity (95%CI) | Specificity (95%CI) | Ref. |
|----------------------------------------------------|-----------|--------------|--------|-------------------|---------------------|---------------------|------|
| <b>Cancer compared to normal</b>                   |           |              |        |                   |                     |                     |      |
| miR-296-5p + miR-25-3p + miR-29a-3p                | 24        | 24           |        | 0.969 (0.927-100) |                     |                     | [30] |
| miR-296-5p + miR-25-3p + miR-29a-3p                | 34        | 35           |        | 0.727 (0.60-0.85) | 65.7%               | 73.3%               | [30] |
| miR-296-5p + miR-25-3p + miR-29a-3p                | 48        | 45           |        | 0.771 (0.67-0.87) | 88.9%               | 68.9%               | [30] |
| miR-296-5p + miR-25-3p + miR-29a-3p                | 18        | 16           |        | 0.862 (0.73-0.99) | 93.3%               | 66.7%               | [30] |
| miR-223-5p + miR-182-5p                            | 35        | 31           | >0.855 | 0.975             | 90.8% (80.9-96.5)   | 96.4% (81.6-99.9)   | [32] |
| miR-146b-5p + miR-182-5p                           | 35        | 31           | >0.758 | 0.906             | 92.3% (82.9-97.5)   | 82.4% (63.1-93.9)   | [32] |
| miR-146b-5p + miR-223-5p                           | 35        | 31           | >0.789 | 0.948             | 89.2% (79.1-95.6)   | 85.7% (67.3-95.9)   | [32] |
| miR-146b-5p + miR-223-5p + miR-182-5p              | 35        | 31           | >0.769 | 0.981             | 93.8% (84.9-98.3)   | 92.9% (76.5-99.1)   | [32] |
| miR-346 + miR-10a-5p + miR-34a-5p                  | 120       | 114          |        | 0.825 (0.78-0.88) |                     |                     | [35] |
| miR-346 + miR-10a-5p + miR-34a-5p                  | 30        | 30           |        | 0.926 (0.86-0.99) |                     |                     | [35] |
| miR-346 + miR-10a-5p + miR-34a-5p                  | 57        | 54           |        | 0.811 (0.73-0.88) |                     |                     | [35] |
| miR-346 + miR-10a-5p + miR-34a-5p                  | 33        | 30           |        | 0.816 (0.71-0.92) |                     |                     | [35] |
| <b>Cancer compared to NG</b>                       |           |              |        |                   |                     |                     |      |
| miR-346 + miR-10a-5p + miR-34a-5p                  | 29        | 29           |        | 0.887 (0.81-0.97) |                     |                     | [35] |
| miR-16-2-3p + miR-223-5p                           | 35        | 30           | <0.922 | 0.704             | 54.3% (36.6-71.2)   | 90.0% (73.5-97.9)   | [32] |
| miR-16-2-3p + miR-223-5p + miR-34c-5p              | 35        | 30           | <0.931 | 0.72              | 60.0%               | 86.7%               | [32] |
| miR-16-2-3p + miR-223-5p + miR-34c-5p + miR-101-3p | 35        | 30           | <0.946 | 0.735             | 71.4% (53.7-85.4)   | 73.3% (54.1-87.7)   | [32] |
| miR-223-5p + miR-34c-5p + miR-101-3p + miR-146b-5p | 35        | 30           | <0.946 | 0.730             | 74.3% (56.7-87.5)   | 66.7% (47.2-82.7)   | [32] |

qRT-PCR was performed in all studies. NG: nodular goiter.

**Supplementary Table S4.** Exosomal miRNAs associated with lymph node metastasis in thyroid cancer patients.

| miRNAs                      | No.<br>LNM | No.<br>LNM | Expression | FC      | <i>p</i> -<br>value | Cutoff | AUC (95%CI)          | Sensitivity | Specificity | Ref. |
|-----------------------------|------------|------------|------------|---------|---------------------|--------|----------------------|-------------|-------------|------|
| miR-21-5p                   | 49         | 15         | High       |         | 0.021               |        |                      |             |             | [21] |
| miR-204-5p                  | 49         | 15         | High       |         | 0.015               |        |                      |             |             | [21] |
| miR-221-3p                  | 49         | 15         | High       |         | 0.036               |        |                      |             |             | [21] |
| miR-146b-5p                 | 49         | 15         | High       |         | 0.008               |        | 0.811                | 76.6%       | 86.7%       | [21] |
| miR-222-3p                  | 49         | 15         | High       |         | 0.007               |        | 0.834                | 78.7%       | 80.0%       | [21] |
| miR-146b-5p +<br>miR-222-3p | 49         | 15         | High       |         |                     |        | 0.895                | 85.1%       | 80.0%       | [21] |
| miR-485-3p                  | 52         | 44         | High       |         |                     |        | 0.805                |             |             | [33] |
| miR-182-5p                  | 8          | 8          | High       | 0.9659  | 0.005               | 0.428  | 0.641 (0.345, 0.937) | 87.5%       | 50%         | [32] |
| miR-26b-5p                  | 8          | 8          | High       | 0.5895  | 0.048               | 0.223  | 0.828 (0.622, 1.035) | 100%        | 50%         | [32] |
| miR-126-3p                  | 8          | 8          | High       | 0.4947  | 0.030               | 0.373  | 0.688 (0.402, 0.973) | 100%        | 50%         | [32] |
| miR-542-3p                  | 8          | 8          | High       | 0.4778  | 0.045               | 0.680  | 0.969 (0.896, 1.042) | 87.5%       | 100%        | [32] |
| miR-32-5p                   | 8          | 8          | High       | 0.4653  | 0.034               | 0.232  | 0.953 (0.862, 1.044) | 100%        | 75%         | [32] |
| miR-363-3p                  | 8          | 8          | High       | 0.4385  | 0.021               | 0.688  | 0.828 (0.612, 1.045) | 75%         | 87.5%       | [32] |
| miR-130a-3p                 |            |            | Low        |         |                     |        |                      |             |             | [26] |
| miR-148a-3p                 |            |            | Low        |         |                     |        |                      |             |             | [29] |
| miR-1912                    | 8          | 8          | Low        | -1.3324 | 0.023               | 0.517  | 0.672 (0.38, 0.964)  | 100%        | 50%         | [32] |
| miR-323a-5p                 | 8          | 8          | Low        | -1.1819 | 0.018               | 0.621  | 0.859 (0.638, 1.081) | 87.5%       | 87.5%       | [32] |
| miR-543                     | 8          | 8          | Low        | -1.1389 | 0.023               | 0.642  | 0.859 (0.638, 1.081) | 87.5%       | 87.5%       | [32] |
| miR-381-3p                  | 8          | 8          | Low        | -1.0414 | 0.006               | 0.541  | 0.766 (0.504, 1.027) | 100%        | 62.5%       | [32] |
| miR-128-3p                  | 8          | 8          | Low        | -0.9953 | 0.019               | 0.578  | 0.781 (0.534, 1.028) | 100%        | 62.5%       | [32] |
| miR-139-5p                  | 8          | 8          | Low        | -0.6265 | 0.040               | 0.367  | 0.828 (0.622, 1.035) | 100%        | 50%         | [32] |
| miR-885-3p                  | 8          | 8          | Low        | -0.6164 | 0.036               | 0.401  | 0.797 (0.561, 1.032) | 100%        | 62.5%       | [32] |
| miR-409-5p                  | 8          | 8          | Low        | -0.5834 | 0.024               | 0.405  | 0.594 (0.292, 0.896) | 87.5%       | 37.5%       | [32] |
| miR-28-5p                   | 8          | 8          | Low        | -0.4521 | 0.009               | 0.559  | 0.562 (0.248, 0.877) | 37.5%       | 100%        | [32] |
| miR-151a-5p                 | 8          | 8          | Low        | -0.4198 | 0.047               | 0.504  | 0.688 (0.395, 0.98)  | 75%         | 75%         | [32] |
| miR-490-3p                  | 8          | 8          | Low        | -0.3696 | 0.036               | 0.505  | 0.547 (0.227, 0.867) | 75%         | 62.5%       | [32] |

LNM: lymph node metastasis; FC: log2 fold change; AUC: area under the curve.

**Supplementary Table S5.** List of target genes of KEGG pathways enriched in thyroid cancer exosomal miRNA meta-signature.

| KEGG pathway                                                      | Hits/Pop Hits | Target genes                                                                                                                                                      |
|-------------------------------------------------------------------|---------------|-------------------------------------------------------------------------------------------------------------------------------------------------------------------|
| hsa04068 FoxO signaling pathway                                   | 10/131        | SGK3; BCL6; TGFBR1; SIRT1; BCL2L11; CCND2; FOXO1; MAPK1; MAP2K1; SMAD4                                                                                            |
| hsa04218 Cellular senescence                                      | 12/160        | TSC1; E2F5; TGFBR1; SIRT1; ETS1; CDK6; E2F3; CCND2; FOXO1; MAPK1; MAP2K1; RRAS                                                                                    |
| hsa05200 Pathways in cancer                                       | 24/531        | ESR1; MITF; IL6R; BCL2; TPM3; LEF1; TGFBR1; ETS1; CDK6; FGFR1; BCL2L11; E2F3; GNA13; PDGFRA; CCND2; FOXO1; GNAQ; MAPK1; MAP2K1; TRAF6; SMAD4; CCDC6; APPL1; PLCB1 |
| hsa04151 PI3K-Akt signaling pathway                               | 13/354        | TSC1; IL6R; BDNF; BCL2L11; CREB3L2; PHLPP2; RBL2; PDGFRA; ITGA5; ITGB8; NRAS; EFNA1; CCNE2                                                                        |
| hsa05215 Prostate cancer                                          | 10/97         | BCL2; LEF1; ERG; FGFR1; E2F3; CREB3L2; PDGFRA; FOXO1; MAPK1; MAP2K1                                                                                               |
| hsa05210 Colorectal cancer                                        | 8/86          | BCL2; LEF1; TGFBR1; BCL2L11; MAPK1; MAP2K1; SMAD4; APPL1                                                                                                          |
| hsa05218 Melanoma                                                 | 7/72          | MITF; CDK6; FGFR1; E2F3; PDGFRA; MAPK1; MAP2K1                                                                                                                    |
| hsa04919 Thyroid hormone signaling pathway                        | 7/137         | THRB; RCAN1; EP300; ATP2A2; NRAS; PLCB1; NOTCH1                                                                                                                   |
| hsa05206 MicroRNAs in cancer                                      | 12/310        | BCL2; FOXP1; SIRT1; CDK6; BMPR2; BCL2L11; E2F3; RDX; PDGFRA; CCND2; MAPK1; MAP2K1; TGFBR1; SOX4                                                                   |
| hsa01521 EGFR tyrosine kinase inhibitor resistance                | 7/79          | IL6R; BCL2; BCL2L11; AXL; PDGFRA; MAPK1; MAP2K1                                                                                                                   |
| hsa05216 Thyroid cancer                                           | 5/37          | TPM3; LEF1; MAPK1; MAP2K1; CCDC6                                                                                                                                  |
| hsa04520 Adherens junction                                        | 6/71          | LEF1; TGFBR1; FGFR1; ACTG1; MAPK1; SMAD4                                                                                                                          |
| hsa04211 Longevity regulating pathway                             | 6/89          | TSC1; SIRT1; CREB3L2; SESN3; FOXO1; APPL1                                                                                                                         |
| hsa04115 p53 signaling pathway                                    | 5/72          | BCL2; CDK6; SESN3; ZMAT3; CCND2                                                                                                                                   |
| hsa04140 Autophagy                                                | 7/137         | TSC1; BCL2; MAPK1; MAP2K1; TRAF6; RRAS; ATG2B                                                                                                                     |
| hsa04810 Regulation of actin cytoskeleton                         | 9/213         | FGFR1; ACTG1; RDX; GNA13; PDGFRA; TIAM1; MAPK1; MAP2K1; RRAS                                                                                                      |
| hsa04550 Signaling pathways regulating pluripotency of stem cells | 7/142         | FGFR1; REST; BMPR2; PCGF3; MAPK1; MAP2K1; SMAD4                                                                                                                   |
